# The American Journal of Psychiatry

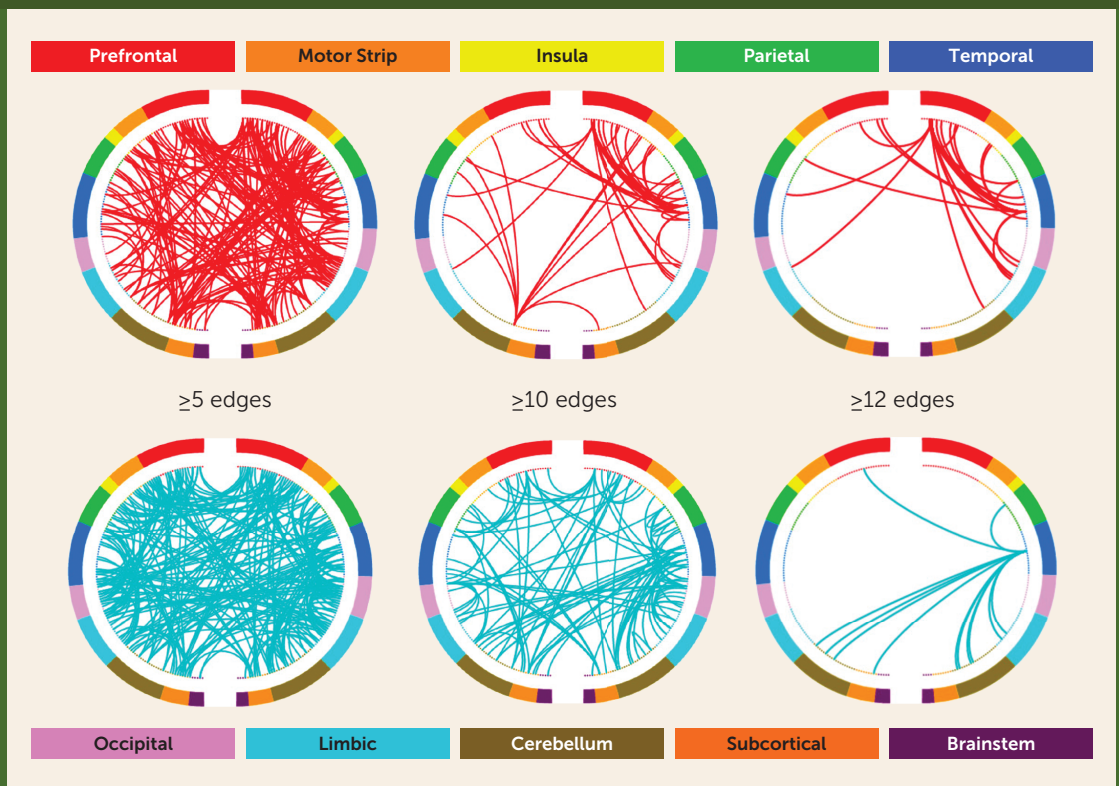

Improving Our Understanding of Substance Use Disorders

Connectome-Based Prediction of Cocaine Abstinence

Phenotype and Environment Matter: Discovering the Genetic  
and Epigenetic Architecture of Alcohol Use Disorders

A Population-Based Analysis of the Relationship Between  
Substance Use and Adolescent Cognitive Development
