#1 TMS CHOICE OF DOCTORS

DO YOU WANT  
INNOVATION

OR

IMITATION?

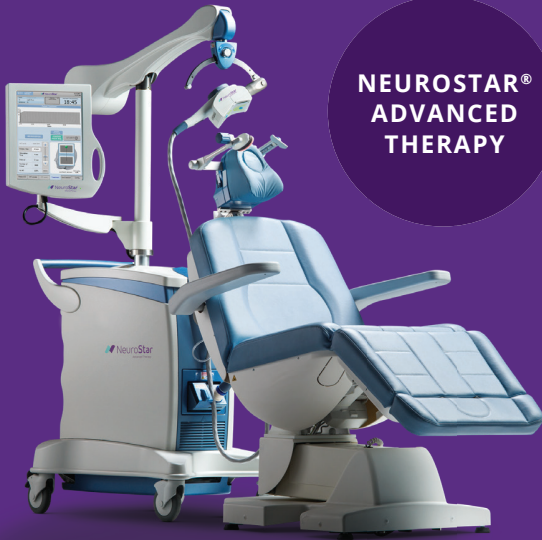

NEUROSTAR®  
ADVANCED  
THERAPY

BASIC  
TMS  
SYSTEMS

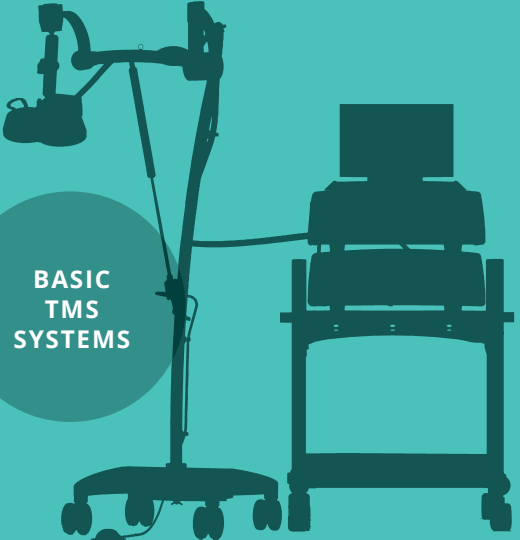

|     |                                                                           |    |
|-----|---------------------------------------------------------------------------|----|
| YES | #1 TMS CHOICE OF DOCTORS                                                  | NO |
| YES | 3D POSITIONING <i>ensures precise coil placement</i>                      | NO |
| YES | CONTACT SENSING <i>continuously monitors patient contact</i>              | NO |
| YES | REAL-TIME FEEDBACK <i>relays treatment info and alerts to technicians</i> | NO |
| YES | MT ASSIST® <i>guides MT location and determines treatment dose</i>        | NO |

Unlike NeuroStar Advanced Therapy, basic TMS systems don't come close to providing the precision technology you need to help transform patients' lives.

**INDICATION**

NeuroStar® is indicated for the treatment of Major Depressive Disorder in adult patients who have failed to receive satisfactory improvement from prior antidepressant medication in the current episode.

**IMPORTANT INFORMATION**

The most common side effect is pain or discomfort at or near the treatment site. These events are transient; they occur during the TMS treatment course and do not

occur for most patients after the first week of treatment. NeuroStar Advanced Therapy should not be used with patients who have non-removable conductive metal in or near the head.

NeuroStar Advanced Therapy is available by prescription only. Please visit [NeuroStar.com](http://NeuroStar.com) for full safety and prescribing information.

**NeuroStar.com | 1-877-600-7555**

©2018 Neuronetics, Inc. 53-51466-000 Rev A

**RIGHT DOSE.  
RIGHT LOCATION.  
EVERY TIME.**

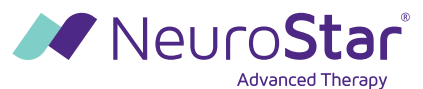

# A Mission for Better

SMI Adviser helps clinicians provide better care and support to people who have serious mental illness.

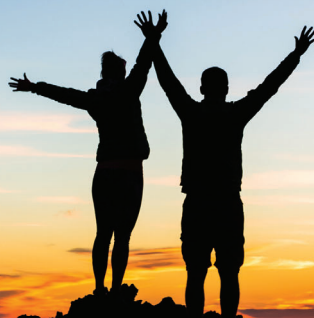

**More than 10 million adults in the U.S. suffer from serious mental illness (SMI) each year.** SMI includes bipolar disorder, major depressive disorder, and schizophrenia.

**As a mental health clinician, you are on the front lines.** These are complex conditions. How can you find evidence-based answers that support your clinical decisions?

**SMI Adviser is here to help.** Our mission is to advance the use of a person-centered approach to care that ensures people who have SMI find the treatment and support they need.

30+ national mental health organizations help lead SMI Adviser. Get consultations from experts. Take free online courses. Find answers that help create better.

- ⊕ Better clinical support.
- ⌘ Better resources for families.
- ⌘ Better care for people who have SMI.

**So they can find better lives.**

**Join our #MissionForBetter at [SMIadviser.org/ajp](https://SMIadviser.org/ajp)**

# YOU CAN SAVE LIVES.

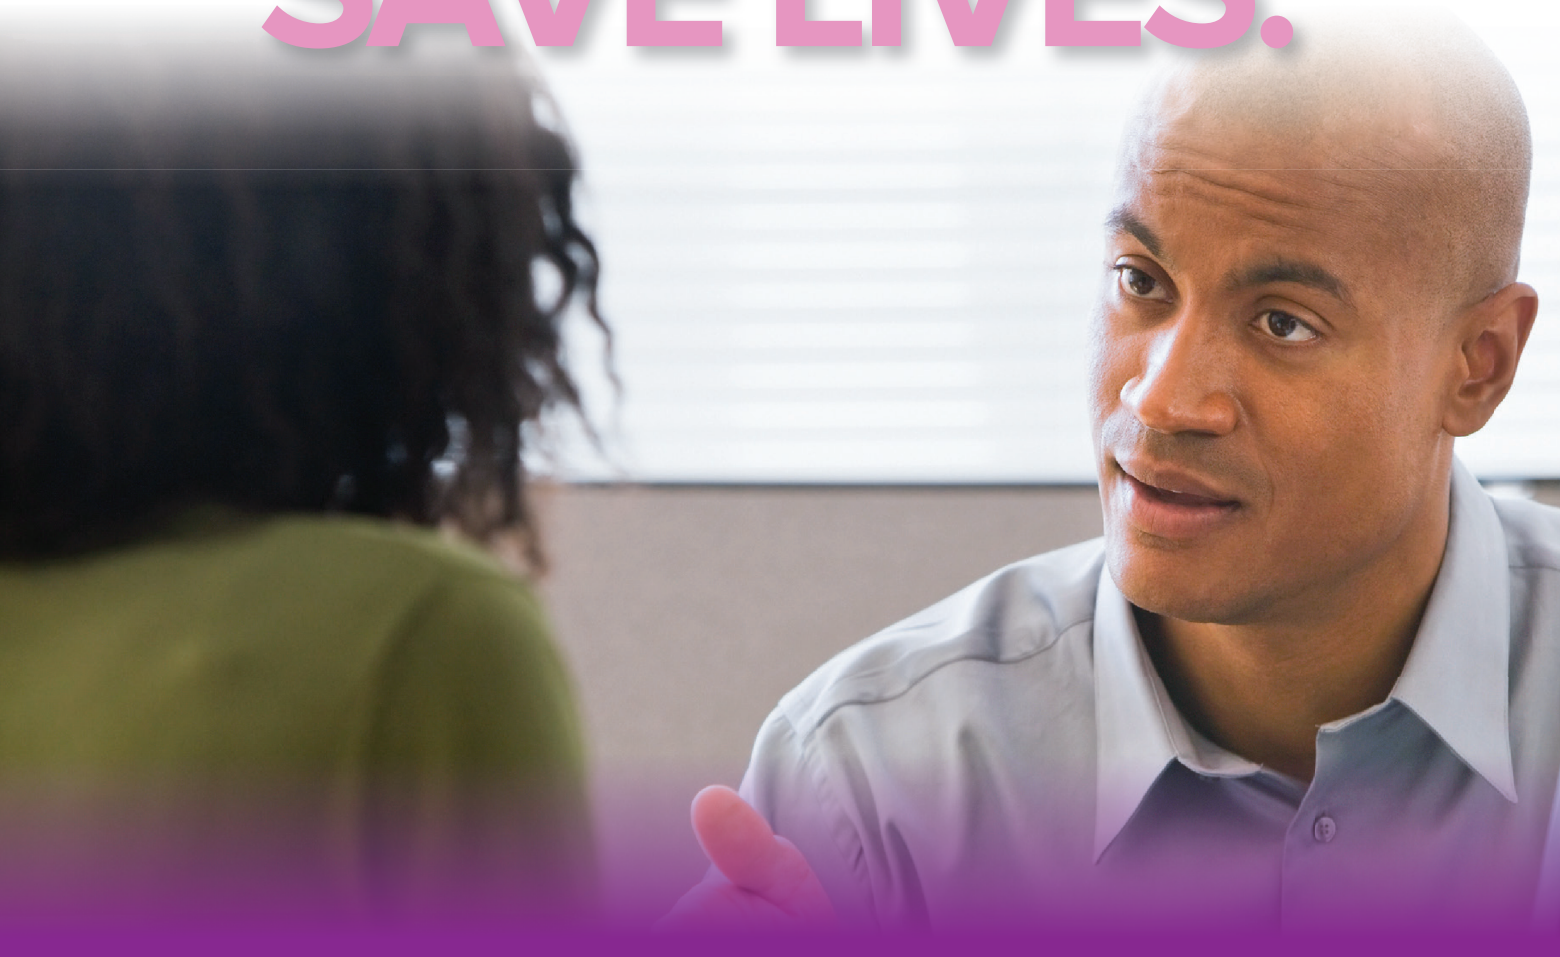

**Treating tobacco use is an important part of mental health treatment.**

Double your patients' chances of quitting with counseling and medication.

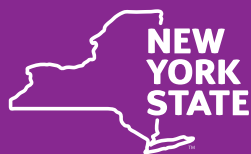

**Department  
of Health**

**[TalkToYourPatients.health.ny.gov](http://TalkToYourPatients.health.ny.gov)**

U.S. Dept. of Health and Human Services, Public Health Service, Treating Tobacco Use and Dependence  
Clinical Practice Guideline 2008 Update

# THE AMERICAN PSYCHIATRIC ASSOCIATION

800 Maine Avenue, S.W., Suite 900, Washington, D.C. 20024

(888) 357-7924 (toll-free inside the U.S. and Canada)

web site: [www.psychiatry.org](http://www.psychiatry.org) • e-mail: [apa@psych.org](mailto:apa@psych.org)

## Chairpersons of Councils, Committees, and Task Forces

### Standing Committees

|                             |                             |
|-----------------------------|-----------------------------|
| <b>Bylaws</b>               | Esperanza Diaz, M.D.        |
| <b>Elections</b>            | Joseph A. Cheong, M.D.      |
| <b>Ethics</b>               | Ezra E.H. Griffith, M.D.    |
| <b>Finance and Budget</b>   | Ann Marie T. Sullivan, M.D. |
| <i>Audit</i>                | Gregory W. Dalack, M.D.     |
| <i>Investment Oversight</i> | David Fassler, M.D.         |
| <b>Joint Reference</b>      | Bruce J. Schwartz, M.D.     |
| <b>Membership</b>           | William Arroyo, M.D.        |
| <b>Nominating</b>           | Anita S. Everett, M.D.      |
| <b>Tellers</b>              | Jose P. Vito, M.D.          |

### Non-Standing Committee

|                             |                              |
|-----------------------------|------------------------------|
| <b>Conflict of Interest</b> | Philip R. Muskin, M.D., M.A. |
|-----------------------------|------------------------------|

### Councils

#### Council on Addiction Psychiatry

Andrew J. Saxon, M.D.

#### Council on Advocacy and Government Relations

Patrick S. Runnels, M.D.

*Advocacy and Litigation Funding*

Bhasker J. Dave, M.D.

#### Council on Children, Adolescents, and Their Families

Gabrielle Shapiro, M.D.

#### Council on Communications

Carol A. Bernstein, M.D.

#### Council on Consultation-Liaison Psychiatry

David F. Gitlin, M.D.

#### Council on Geriatric Psychiatry

Robert P. Roca, M.D.

#### Council on Healthcare Systems and Financing

Harsh K. Trivedi, M.D.

*Integrated Care*

Ken C. Hopper, M.D.

*RBRVS, Codes and Reimbursement*

Gregory G. Harris, M.D.

*Reimbursement for Psychiatric Care*

Laurence H. Miller, M.D.

*Telepsychiatry*

James H. Shore, M.D.

#### Council on International Psychiatry

Bernardo Ng, M.D.

*Chester Pierce Human Rights Award Committee*

James L. Griffith, M.D.

#### Council on Medical Education and Lifelong Learning

Mark H. Rapaport, M.D.

*Scientific Program*

Jacqueline M. Feldman, M.D.

*Scientific Program—IPS (Oct. to Oct. tenure)*

Eric Yarbrough, M.D.

*Vestermark Award Committee*

Lowell D. Tong, M.D.

#### Council on Minority Mental Health and Health Disparities

Christina V. Mangurian, M.D.

#### Council on Psychiatry and Law

Debra A. Pinals, M.D.

*Judicial Action*

Marvin S. Swartz, M.D.

#### Council on Quality Care

Grayson S. Norquist, M.D.

*Mental Health Information Technology*

Brent Nelson, M.D.

*Quality and Performance Measurement*

Carol Alter, M.D.

*Practice Guidelines*

Daniel J. Anzia, M.D.

#### Council on Research

Dwight L. Evans, M.D.

*Psychiatric Dimensions of Disasters*

Joshua C. Morganstein, M.D.



# The American Journal of Psychiatry

## Residents' Journal

[ajp.psychiatryonline.org/loi/ajp-rj](http://ajp.psychiatryonline.org/loi/ajp-rj)

### January 2019

- 2 The Mental Health of ICE Detainees and Their Families**  
Erik Bayona, M.D.  
*Assessing health outcomes and political variables in a humanitarian crisis*
- 4 An Interview With Psychiatry Residency Program Director Toni L. Johnson, M.D.**  
Interviewed by Oliver Glass, M.D.  
*Emphasizing the importance of practicing in underserved communities*
- 7 Integrated Care: A Dialect of Disintegration and Integration**  
Anna Kim, M.D.  
*Examining the integration of behavioral health and primary care services*
- 8 The Transition From Student to Teacher**  
Brent D. Schnipke, M.D.  
*Identifying a milestone in residency training*
- 9 Taking a History**  
Anand Jayanti, B.A.  
*Volunteering in a nursing home facility*
- 10 Call for Applications to Join the 2019 Editorial Board**
- 11 Residents' Resources**

**The Residents' Journal** is an e-publication that serves as a forum for sharing ideas and experiences in training, clinical practice, research, and careers.

**The Residents' Journal** considers manuscripts authored by medical students, resident physicians, and fellows. For information about submitting manuscripts, visit the **Author Resources** page online: [https://ajp.psychiatryonline.org/residents\\_journal/rj\\_ifora](https://ajp.psychiatryonline.org/residents_journal/rj_ifora).

### 2018–2019 Editorial Board

**Editor-in-Chief:** Oliver Glass, M.D.

**Senior Deputy Editor:** Shapir Rosenberg, M.D.

**Deputy Editor:** Matthew Edwards, M.D.

**Deputy Editor:** Anna Kim, M.D.

**Deputy Editor/Podcast Editor:**  
Lindsay Lebin, M.D.

**Associate Editors:** Carol Chan, M.D.

Alexander Cole, M.D.

Jason Garner, M.D., J.D.

David Latov, M.D.

Elon Richman, M.D.

**Culture Editor:** Erik Bayona, M.D.

**Culture Editor/Social Media Editor:**  
Somya Abubucker, M.D.

### CALL FOR PAPERS

All article types are welcome; all submissions will be peer reviewed.

To submit an article, go to <https://mc.manuscriptcentral.com/appi-ajp>, and select a manuscript type for AJP Residents' Journal.

 [Facebook.com/AJPResidentsJournal](https://www.facebook.com/AJPResidentsJournal)

 [@AJP\\_ResJournal](https://twitter.com/AJP_ResJournal)

AMERICAN  
PSYCHIATRIC  
ASSOCIATION

PUBLISHING

[www.appi.org](http://www.appi.org)

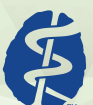

# Psychiatrists

## MINNESOTA

HealthPartners is one of the Upper Midwest's leading multispecialty physician groups. We have practice opportunities for talented, caring BC/BE psychiatrists in metropolitan Minneapolis/St. Paul and central Minnesota.

## Inpatient/Adult

- **Regions Hospital (St. Paul, MN)**

Our state-of-the-art inpatient psychiatric facilities allow our team of psychiatrists, residents, therapists, social workers, NPs/PAs and nursing staff to provide exceptional care to adult psychiatric inpatients. Our Regions care model schedule is 7 days on/7 days off.

## Outpatient/Adult

- **Central Minnesota (Sartell/St. Cloud)**
- **Metropolitan Minneapolis/St. Paul**

These teams provide integrated outpatient mental health services in our primary care and outpatient specialty clinics located within a variety of urban, suburban and semi-rural communities. Full-time or part-time practices are available. No hospital call responsibilities.

In addition to competitive salaries, HealthPartners offers an excellent benefits package, including an employer-matched 401(k) and 457(b), generous personal time off, malpractice insurance coverage, and more.

---

Let us tell you more! Please forward your CV and cover letter to:  
**lori.m.fake@healthpartners.com**, apply online at **healthpartners.com/careers**, or call 800-472-4695 x1. EOE

---

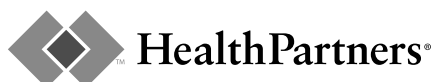

## Student Mental Health

*A Guide for Psychiatrists,  
Psychologists, and Leaders  
Serving in Higher Education*

Edited by Laura Weiss Roberts, M.D., M.A.

### Student Mental Health

is both down-to-earth and aspirational, providing evidence and best practices to ensure greater mental health on campus, while stimulating conversation about how to ensure and optimize the value of higher education through thoughtful, sophisticated approaches to student mental health.

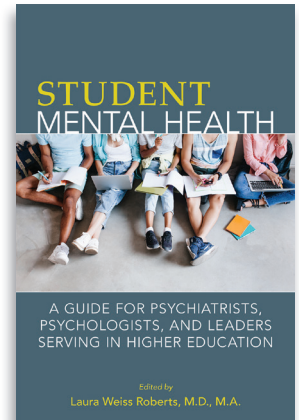

The chapter authors address life transitions and the university student experience, as well as the challenges of caring for university students with mental health issues.

The book has positive strategies, including ways to foster mental health for distinct university student populations.

2018 • 530 pages • ISBN 978-1-61537-114-3 • Paperback • \$62.00 • Item #37114  
2018 • 530 pages • ISBN 978-1-61537-194-5 • eBook • \$49.95 • Item #37194

AMERICAN  
PSYCHIATRIC  
ASSOCIATION  
PUBLISHING

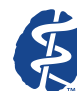

[www.appi.org](http://www.appi.org)  
Toll Free: 1-800-368-5777  
Email: [appi@psych.org](mailto:appi@psych.org)

20% Discount • American Psychiatric Association Members  
25% Discount • APA Resident-Fellow Members

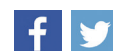

# Go Online

Visit [ajp.psychiatryonline.org](http://ajp.psychiatryonline.org) for these features!

## **AJP in Advance** *Discover the latest research advances before they appear in print*

### **Doubly Randomized Preference Trial of Prolonged Exposure Versus Sertraline for Treatment of PTSD**

Prolonged exposure, as part of cognitive behavioral therapy, and selective serotonin reuptake inhibitors (SSRIs) represent established treatments for post-traumatic stress disorder (PTSD). The authors examine the degree to which a patient's preference for one of these therapies impacts treatment response. They use a creative design to show that patient choice impacts on response to treatment, at least partially through adherence.

### **The Emergent Course of Bipolar Disorder: Observations Over Two Decades From the Canadian High-Risk Offspring Cohort**

Bipolar disorder is recognized as a mental disorder with very high family loading but questions remain on the clinical factors that identify risk beyond parental history. The authors report new longitudinal data in a sample of more than 400 youth followed over time into adulthood. More than 300 of them eventually developed bipolar disorder. The study identifies many clinical indicators of risk among them, including childhood anxiety and sleep problems.

## **AJP CME** *Earn CME credit: 3 courses per issue*

This month's courses appear on pages 167–170.

Each short course is based on one article in this issue and can earn up to 1 *AMA PRA Category 1 Credit™*. CME credit is issued only **online**, and a paid subscription to AJP's CME course program is required.

Visit [psychiatryonline.org/cme](http://psychiatryonline.org/cme) and click on the "American Journal of Psychiatry" tab.

## **AJP Multimedia** *Access Audio or Video for highlights of each issue*

In AJP Audio this month, Executive Editor Michael Roy speaks with Patricia J. Conrod, Ph.D., about her research on the relationship between substance use and adolescent cognitive development. Deputy Editor Kathleen T. Brady, M.D., Ph.D., discusses her editorial on improving our understanding of substance use disorders.

In this month's video, Deputy Editor Daniel S. Pine, M.D., discusses the articles "Connectome-Based Prediction of Cocaine Abstinence" and "Mega-Analysis of Gray Matter Volume in Substance Dependence: General and Substance-Specific Regional Effects."

## **History of Psychiatry** *Revisit the field's rich history through the AJP Archive*

### **50 Years Ago this Month: The Anti-Community Mental Health "Movement"**

Five years before beginning his 23-year tenure as Medical Director of The American Psychiatric Association, Melvin Sabshin wrote, in response to developing opposition to community mental health among professional and nonprofessional groups, that while no unified anti-community mental health movement would emerge "the relative neglect of theory building and of research in community mental health will increasingly become an Achilles heel."

Psychiatry Online

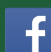

@AmJPsychiatry

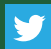

AMERICAN  
PSYCHIATRIC  
ASSOCIATION  
PUBLISHING

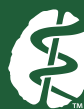

[www.appi.org](http://www.appi.org)  
1-800-368-5777  
[appi@psych.org](mailto:appi@psych.org)
