## PERSPECTIVAS

### NOTA DEL EDITOR

#### A10 [New Findings Relevant to Substance Use Disorders]

*Ned H. Kalin, M.D.*

### EDITORIALE

#### 87 Mejorando nuestra comprensión de los trastornos por consumo de sustancias

*Kathleen T. Brady, M.D., Ph.D.* **AUDIO**

#### 90 Fumar cannabis y deterioros adquiridos en la cognición: Empezar temprano parece ser una pésima idea

*Philip D. Harvey, Ph.D.*

#### 92 El fenotipo y el entorno importan: Descubriendo la arquitectura genética y epigenética de los trastornos por consumo de alcohol

*Jonathan D. Pollock, Ph.D., Amy C. Lossie, Ph.D.*

### PERSPECTIVAS EN SALUD MENTAL GLOBAL

#### 96 Investigación psiquiátrica en Corea del Norte en el siglo XXI

*Seon-Cheol Park, M.D., Ph.D., et al.*

## NUEVAS INVESTIGACIONES

### ARTÍCULOS

#### 98 Un análisis basado en la población de la relación entre el consumo de sustancias y el desarrollo cognitivo de los adolescentes

*Jean-François G. Morin, B.A., et al.* **EDITORIAL • CME • AUDIO**

El consumo de sustancias puede causar reducciones en algunas habilidades cognitivas en la adolescencia. Los efectos del consumo de cannabis parecen ser más pronunciados que los que se observan para el alcohol.

#### 107 Meta-análisis de estudios de asociación del genoma completo de la prueba de identificación de los trastornos por consumo de alcohol (AUDIT) en dos cohortes basadas en la población

*Sandra Sanchez-Roige, Ph.D., et al.* **EDITORIAL • AUDIO**

Utilizando cohortes grandes basadas en la población del Biobanco del Reino Unido y 23andMe, el estudio identificó un rango de asociaciones entre genes asociados al abuso del alcohol y varios otros fenotipos. Los factores genéticos comunes dan cuenta de una proporción prominente de la variación en los fenotipos de consumo de alcohol.

#### 119 Mega-análisis del volumen de sustancia gris en la dependencia de sustancias: Efectos regionales generales y específicos de cada sustancia

*Scott Mackey, Ph.D., et al.* **EDITORIAL • AUDIO • VIDEO**

Se puede observar un bajo volumen o grosor en muchas regiones cerebrales en individuos con dependencia de sustancias. El desarrollo de biomarcadores clínicamente útiles, en neuroimágenes, de la dependencia de sustancias puede ser más productivo si se basa en patrones más amplios de función o estructura cerebrales en lugar de basarse en las diferencias en regiones cerebrales únicas consideradas por separado.

#### 129 Un ensayo aleatorizado que compara la naltrexona oral y suspensión inyectable de liberación prolongada, ambas combinadas con terapia comportamental, para el tratamiento del trastorno por consumo de opiáceos

*Maria A. Sullivan, M.D., Ph.D., et al.* **EDITORIAL • AUDIO**

La forma inyectable de liberación prolongada de la naltrexona, combinada con terapia comportamental, tiene beneficios clínicos significativos en comparación con la naltrexona más terapia comportamental, para el tratamiento de pacientes con dependencia de opiáceos.

#### 138 Efectos protectores del embarazo en el riesgo de trastorno por consumo de alcohol

*Alexis C. Edwards, Ph.D., et al.* **EDITORIAL • CME • AUDIO**

El embarazo juega un papel clave, aunque no definitivo, en la reducción del trastorno por consumo de alcohol tanto para la madre como para el padre. La asociación es más pronunciada para las madres.

**146 Metilación específica de alelo de SPDEF: Un moderador nuevo del estrés psicosocial y el abuso de sustancias**

Nicole Tay, M.Sc., et al. **EDITORIAL • AUDIO**

El análisis de las ubicaciones en el genoma donde el estrés está relacionado con la metilación de ADN revela un mecanismo epigenético nuevo que ayuda a explicar cómo la exposición al estrés psicosocial influye el abuso de sustancias en los adolescentes.

**156 Predicción de la abstinencia de cocaína basada en el conectoma**

Sarah W. Yip, Ph.D., M.Sc., et al. **EDITORIAL • CME • AUDIO • VIDEO**

[Individual differences in network-based brain functions may predict variability in treatment response.]

**COMUNICADOS Y ACTUALIZACIONES**

**CARTAS AL EDITOR**

**165 Prazosina y trastorno por consumo de alcohol**

Robert Andrew Kleinman, M.D., Michael J. Ostacher, M.D., M.P.H.

**165 Prazosina para el trastorno por consumo de alcohol: Respuesta a Kleinman y Ostacher**

Tracy L. Simpson, Ph.D., et al.

**OTROS TEMAS DE INTERÉS**

**167 Educación Médica Continuada**

**Cubierta:** [Positive and negative abstinence networks based on connectivity between macroscale brain regions from the article by Yip et al. in this issue exploring prediction of cocaine abstinence (p. 156).]

**AUDIO** Article is highlighted in AJP Audio, a downloadable .mp3 file available at [ajp.psychiatryonline.org](http://ajp.psychiatryonline.org)

**EDITORIALE** Article is discussed in one of the issue's editorials

**EMC** A course covering the content of this article is available online for paid subscribers to the AJP CME Course program

**VIDEO** Article is highlighted online by Deputy Editor Daniel S. Pine, M.D.

**La Tabla de Contenidos y resúmenes de Este Número Está Disponible en Español**

*(Abstracts are also available in Spanish)*

Translation presented in collaboration with the Office of Global Health, Rutgers-Robert Wood Johnson Medical School. Support for this effort provided by ACTA Colombia.

**Translation courtesy of**

**Sergi Casals, M.A.**, Garuna, Medellín, Colombia ([www.garunaeditors.com](http://www.garunaeditors.com))

**Carlos López Jaramillo, M.D., M.Sc., Ph.D.**, Universidad de Antioquia, Medellín, Colombia

**Javier I. Escobar, M.D., M.Sc.**, Rutgers-Robert Wood Johnson Medical School

# Un análisis basado en la población de la relación entre el consumo de sustancias y el desarrollo cognitivo de los adolescentes

Jean-François G. Morin, B.A., Mohammad H. Afzali, Ph.D., Josiane Bourque, M.Sc., Sherry H. Stewart, Ph.D., Jean R. Séguin, Ph.D., Maeve O'Leary-Barrett, Ph.D., Patricia J. Conrod, Ph.D.

**Objetivo:** El abuso de alcohol y el de cannabis están relacionados con la cognición deteriorada. Para inferir la causalidad, cuatro modelos teóricos no exclusivos pueden explicar dicha asociación: 1) un modelo de vulnerabilidad subyacente común; 2) un modelo de neuroplasticidad en el que el deterioro es concurrente con cambios en el consumo de sustancias, pero temporal debido a los procesos cerebrales neuroplásticos que restablecen las funciones; 3) un modelo de neurotoxicidad de deterioro a largo plazo como consecuencia del consumo de sustancias; y 4) una hipótesis de sensibilidad del desarrollo de los efectos específicos de la edad. Utilizando un diseño sensible al desarrollo, los autores investigaron las relaciones entre los cambios de un año a otro en el consumo de sustancias y el desarrollo cognitivo.

**Método:** Una muestra basada en la población de 3.826 estudiantes de séptimo grado de 31 colegios, que consistía en el 5% de todos los estudiantes que empezaron bachillerato en 2012 y 2013 en la región de Gran Montreal fueron evaluados anualmente, por 4 años, en cuanto a consumo de alcohol y de cannabis, memoria de recuperación, razonamiento perceptual, inhibición y memoria de trabajo, utilizando evaluaciones informatizadas basadas en el colegio. Se utilizaron

modelos de regresión multinivel, conducidos por separado para cada sustancia, para evaluar simultáneamente la vulnerabilidad de la prueba (entre sujetos) y los efectos intra-sujeto concurrentes y retardados en cada dominio cognitivo.

**Resultados:** Se detectaron efectos de vulnerabilidad comunes para el cannabis y el alcohol en todos los dominios. El consumo de cannabis, pero no el consumo de alcohol, mostró efectos (neurotóxicos) retardados en el control inhibitorio y la memoria de trabajo y efectos concurrentes en la recuperación de memoria retrasada y el razonamiento perceptual (con algunas pruebas de sensibilidad al desarrollo). Los efectos del cannabis fueron independientes de todos los efectos del alcohol.

**Conclusiones:** Más allá del papel de la cognición en la vulnerabilidad al consumo de sustancias, los efectos concurrentes y retardados del consumo de cannabis en la adolescencia se pueden observar en funciones cognitivas importantes y parecen ser más pronunciados que los que se observan para el alcohol.

*(Am J Psychiatry 2019; 176:98–106)*

## Meta-análisis de estudios de asociación del genoma completo de la prueba de identificación de los trastornos por consumo de alcohol (AUDIT) en dos cohortes basadas en la población

Sandra Sanchez-Roige, Ph.D., Abraham A. Palmer, Ph.D., Pierre Fontanillas, Ph.D., Sarah L. Elson, Ph.D., the 23andMe Research Team, the Substance Use Disorder Working Group of the Psychiatric Genomics Consortium, Mark J. Adams, Ph.D., David M. Howard, Ph.D., Howard J. Edenberg, Ph.D., Gail Davies, Ph.D., Richard C. Crist, Ph.D., Ian J. Deary, Ph.D., M.R.C.Psych., Andrew M. McIntosh, M.D., Toni-Kim Clarke, Ph.D.

**Objetivo:** Los trastornos por consumo de alcohol son afecciones comunes que tienen enormes consecuencias sociales y económicas. Se realizaron análisis de asociación del genoma completo para identificar variantes genéticas asociadas a una medida de aproximación del consumo de alcohol y del abuso de alcohol y para explorar la base genética compartida entre estas medidas y el consumo de otras sustancias, los rasgos psiquiátricos y los comportamentales.

**Método:** Este estudio utilizó medidas cuantitativas de la prueba de identificación de trastornos por consumo de alcohol (*Alcohol Use Disorders Identification Test*, AUDIT) de dos cohortes basadas en la población de ancestros europeos (*UK Biobank* [N=121.604] y *23andMe* [N=20.328]) y realizó un meta-análisis de estudios de asociación del genoma completo (GWAS). Se realizaron dos análisis adicionales de GWAS, un GWAS para las puntuaciones AUDIT en los ítems 1-3, que se centran en el consumo (AUDIT-C) y para las puntuaciones en los ítems 4-10, que se centran en las consecuencias problemáticas del hábito de tomar (AUDIT-P).

**Resultados:** El meta-análisis de GWAS de la puntuación total de AUDIT identificó 10 sitios (*loci*) de riesgo. Se localizaron nuevas asociaciones en genes, incluyendo *JCAD* y *SLC39A13*; este estudio también replicó señales identificadas anteriormente en los genes *ADH1B*, *ADH1C*, *KLB* y *GCKR*. Las dimensiones de AUDIT mostraron correlaciones genéticas

positivas con el consumo de alcohol ( $r_g=0,76-0,92$ ) y la dependencia del alcohol de acuerdo al DSM-IV ( $r_g=0,33-0,63$ ). Las puntuaciones AUDIT-P y AUDIT-C mostraron patrones de asociación significativamente diferentes en diferentes rasgos, incluyendo los trastornos psiquiátricos. La puntuación AUDIT-P estuvo correlacionada genéticamente de forma positiva con la esquizofrenia ( $r_g=0,22$ ), el trastorno de depresión mayor ( $r_g=0,26$ ) y el trastorno por déficit de atención e hiperactividad ( $r_g=0,23$ ), mientras que la puntuación AUDIT-C estuvo correlacionada genéticamente de forma negativa con el trastorno de depresión mayor ( $r_g=-0,24$ ) y el TDAH ( $r_g=-0,10$ ). Este estudio también utilizó los datos de AUDIT en el Biobanco del Reino Unido para identificar umbrales para dicotomizar la puntuación global de AUDIT que optimicen las correlaciones genéticas con la dependencia del alcohol del DSM-IV. Codificar a los individuos con puntuación global de AUDIT  $\leq 4$  como sujetos control y a los que obtuvieron puntuaciones  $\leq 12$  como sujetos de estudio produjo una correlación genética alta y significativa con la dependencia del alcohol del DSM-IV ( $r_g=0,82$ ) reteniendo la mayoría de los sujetos.

**Conclusiones:** Las puntuaciones AUDIT establecidas en cohortes basadas en la población se pueden utilizar para explorar la base genética tanto del consumo de alcohol como de los trastornos por consumo de alcohol.

(*Am J Psychiatry* 2019; 176:107–118)

## Mega-análisis del volumen de sustancia gris en la dependencia de sustancias: Efectos regionales generales y específicos de cada sustancia

Scott Mackey, Ph.D., Nicholas Allgaier, Ph.D., Bader Charani, Ph.D., Philip Spechler, B.A., Catherine Orr, Ph.D., Janice Bunn, Ph.D., Nicholas B. Allen, Ph.D., Nelly Alia-Klein, Ph.D., Albert Batalla, M.D., Ph.D., Sara Blaine, Ph.D., Samantha Brooks, Ph.D., Elisabeth Caparelli, Ph.D., Yann Ying Chye, Ph.D., Janna Cousijn, Ph.D., Alain Dagher, M.D., Sylvane Desrivieres, Ph.D., Sarah Feldstein-Ewing, Ph.D., John J. Foxe, Ph.D., Rita Z. Goldstein, Ph.D., Anna E. Goudriaan, Ph.D., Mary M. Heitzeg, Ph.D., Robert Hester, Ph.D., Kent Hutchison, Ph.D., Ozlem Korucuoglu, Ph.D., Chiang-Shan R. Li, M.D., Ph.D., Edythe London, Ph.D., Valentina Lorenzetti, Ph.D., Maartje Luijten, Ph.D., Rocio Martin-Santos, M.D., April May, M.A., Reza Momenan, M.D., Angelica Morales, Ph.D., Martin P. Paulus, M.D., Godfrey Pearlson, M.A., M.B.B.S., Marc-Etienne Rousseau, M.Sc., Betty Jo Salmeron, M.D., Renée Schluter, Ph.D., Lianne Schmaal, Ph.D., Gunter Schumann, M.D., Ph.D., Zsuzsika Sjoerds, Ph.D., Dan J. Stein, Ph.D., Elliot A. Stein, Ph.D., Rajita Sinha, Ph.D., Nadia Solowij, Ph.D., Susan Tapert, Ph.D., Anne Uhlmann, Ph.D., Dick Veltman, M.D., Ph.D., Ruth van Holst, Ph.D., Sarah Whittle, Ph.D., Margaret J. Wright, Ph.D., Murat Yücel, Ph.D., Sheng Zhang, Ph.D., Deborah Yurgelun-Todd, Ph.D., Derrek P. Hibar, Ph.D., Neda Jahanshad, Ph.D., Alan Evans, Ph.D., Paul M. Thompson, Ph.D., David C. Glahn, Ph.D., Patricia Conrod, Ph.D., Hugh Garavan, Ph.D., the ENIGMA Addiction Working Group

**Objetivo:** Si bien se ha observado un volumen cerebral bajo en los individuos con dependencia de las sustancias en comparación con sujetos control no dependientes, no ha habido consistencia en cuanto a las regiones cerebrales que exhiben un volumen inferior en diferentes estudios. Además, no está claro si una misma serie de regiones están implicadas en la dependencia de sustancias independientemente de la sustancia consumida o si algunos efectos del volumen cerebral son específicos de algunas sustancias. La respuesta a estos interrogantes puede contribuir a la identificación de biomarcadores de imágenes, clínicamente relevantes. Utilizando datos agrupados de 14 países, los autores buscaron identificar asociaciones generales y específicas de cada sustancia, entre la dependencia y los volúmenes cerebrales regionales.

**Método:** Se examinó la estructura cerebral en un mega-análisis de datos agrupados de 23 laboratorios, publicados anteriormente, que incluían 3.240 individuos, 2.140 de los cuales tenían dependencia de una de cinco sustancias: alcohol, nicotina, cocaína, metanfetamina o cannabis. El volumen subcortical y el grosor cortical en regiones definidas por *Free-Surfer* se compararon con sujetos de control no dependientes combinando todas las categorías de sustancias de la muestra y por separado, controlando la edad, el sexo, el sitio donde se tomaron las imágenes y el volumen intracraneal total. Debi-

do a asociaciones extensivas a la dependencia del alcohol, también se realizó un segundo contraste para la dependencia en todas las sustancias excepto el alcohol. Se empleó una estrategia de método de dos mitades (*split-half*) para evaluar la confiabilidad de los hallazgos.

**Resultados:** Se observó bajo volumen o grosor en muchas regiones cerebrales en individuos con dependencia de sustancias. Los mayores efectos estuvieron asociados al trastorno por consumo de alcohol. Una serie de regiones afectadas relacionadas con la dependencia en general, independientemente de la sustancia, incluyeron la ínsula y la corteza orbitofrontal medial. Además, una clasificación mecánica multivariada de vectores de apoyo, de los volúmenes regionales, clasificó con éxito los individuos con dependencia del alcohol o de la nicotina separándolos de los sujetos de control no dependientes.

**Conclusiones:** Los resultados indican que la dependencia de un rango de diferentes sustancias tiene un mismo sustrato neural y que los patrones diferenciales de volumen regional podrían servir como biomarcadores de la dependencia del alcohol o de la nicotina.

(*Am J Psychiatry* 2019; 176:119–128)

# Un ensayo aleatorizado que compara la naxeltrona oral y la suspensión inyectable de liberación prolongada, ambas combinadas con terapia comportamental, para el tratamiento del trastorno por consumo de opiáceos

Maria A. Sullivan, M.D., Ph.D., Adam Bisaga, M.D., Martina Pavlicova, Ph.D., Kenneth M. Carpenter, Ph.D., C. Jean Choi, M.S., Kaitlyn Mishlen, M.A., Frances R. Levin, M.D., John J. Mariani, M.D., Edward V. Nunes, M.D.

**Objetivo:** La formulación oral de la naltrexona antagonista de opiáceos ha mostrado efectividad limitada para el tratamiento del trastorno por consumo de opiáceos, debido a una baja adherencia. La naltrexona inyectable de liberación prolongada (XR-naltrexona), administrada mensualmente, evita tener que tomar pastillas diariamente, mejorando potencialmente la adherencia, y se ha demostrado que es superior que el placebo para reducir el consumo de opiáceos en 6 meses de tratamiento. Este ensayo de etiqueta abierta comparó los resultados de pacientes con trastorno por consumo de opiáceos tratado con XR-naltrexona o naltrexona oral en combinación con terapia comportamental.

**Método:** Sesenta adultos dependientes de los opiáceos completaron la abstinencia de opiáceos como pacientes internos y se les hizo la transición a naltrexona oral. Fueron estratificados según la gravedad del consumo de opiáceos (seis bolsas o menos versus más de seis bolsas de heroína al día) y se les asignó aleatoriamente (1:1) para continuar el tratamiento con naltrexona oral (N=32) o con XR-naltrexona (N=28) por 24 semanas. La primera dosis de XR-naltrexona (380 mg) se administró antes del alta hospitalaria, con dosis mensuales a partir de entonces, y la naltrexona oral se dio en

una dosis diaria de 50 mg. Todos los participantes recibieron terapia conductual semanalmente para apoyar el tratamiento y la adherencia a la naltrexona.

**Resultados:** Un modelo de riesgos proporcionales de Cox, que ajustó la raza, el género, la ruta de uso y la gravedad del consumo de opiáceos al inicio del estudio, indicó que un número significativamente mayor de pacientes fueron retenidos en el tratamiento por 6 meses en el grupo de XR-Naltrexona (16 de 28 pacientes, 57,1%) que en el grupo de naltrexona oral (nueve de 32 pacientes, 28,1%) (cociente de riesgo=2,18. IC 95%=1,07–4,43).

**Conclusiones:** Los pacientes que recibieron XR-naltrexona tuvieron una tasa de retención en el tratamiento dos veces más alta a los 6 meses, que los pacientes que tomaron naltrexona oral. Estos resultados apoyan el uso de XR-naltrexona combinada con terapia conductual como tratamiento efectivo para pacientes que buscan la abstinencia de opiáceos y tratamiento no agonista para prevenir la recaída en el trastorno por consumo de opiáceos.

(*Am J Psychiatry* 2019; 176:129–137)

## Efectos protectores del embarazo en el riesgo de trastorno por consumo de alcohol

Alexis C. Edwards, Ph.D., Henrik Ohlsson, Ph.D., Dace S. Svikis, Ph.D., Jan Sundquist, M.D., Ph.D., Kristina Sundquist, M.D., Ph.D., Kenneth S. Kendler, M.D.

**Objetivo:** El propósito de los autores fue aclarar la relación entre el matrimonio y el riesgo de trastorno por consumo de alcohol.

**Método:** Los autores usaron datos de registros suecos longitudinales de toda la población, criminales, farmacéuticos y médicos para evaluar si las tasas de trastorno por consumo de alcohol son más bajas durante el embarazo. Compararon mujeres en embarazo nacidas entre 1975 y 1992 (N=322.029) con sujetos control de características similares, con mujeres familiares discordantes para el embarazo, y con períodos pre- y post-embarazo de ellas mismas (intrasujeto). Además, compararon las tasas de trastorno por consumo de alcohol entre las mujeres embarazadas y sus parejas.

**Resultados:** Se encontró que el embarazo estaba inversamente asociado al trastorno por consumo de alcohol en todos los análisis (*odds ratios*, 0,17–0,32). En los análisis de co-familiares, la asociación fue más fuerte entre los individuos con una relación más cercana. Las tasas de trastorno por consumo de alcohol intrasujeto disminuyeron sustancialmente durante el embarazo en comparación con el período pre-embarazo (*odds ratios*, 0,25–0,26), y siguieron

siendo bajas durante los períodos post-parto (*odds ratios*, 0,23–0,31). Los resultados fueron similares para los segundos embarazos (*odds ratio*, 0,23). Las parejas de las mujeres embarazadas también mostraron reducciones en el trastorno por consumo de alcohol (*odds ratio*, 0,45). En las mujeres que quedaron en embarazo a una edad temprana y las que tenían antecedentes penales, la asociación negativa entre el embarazo y el trastorno por consumo de alcohol fue especialmente pronunciada, pero no se observó ninguna moderación por un historial personal o maternal de trastorno por consumo de alcohol de los padres.

**Conclusiones:** Los hallazgos sugieren que el embarazo juega un papel motivacional crítico, y probablemente causal, para reducir el riesgo de trastorno por consumo de alcohol en las mujeres y, en menor medida, en sus parejas. Estos resultados aumentan nuestra comprensión de la relación entre el embarazo y el consumo de alcohol, y demuestran que incluso una afección grave como el trastorno por consumo de alcohol está sujeta a los efectos protectores del embarazo.

(*Am J Psychiatry* 2019; 176:138–145)

## Metilación específica de alelo de SPDEF: Un moderador nuevo del estrés psicosocial y el abuso de sustancias

Nicole Tay, M.Sc., Christine Macare, Ph.D., Yun Liu, Ph.D., Barbara Ruggeri, Ph.D., Tianye Jia, Ph.D., Congying Chu, Ph.D., Francesca Biondo, Ph.D., Alex Ing, Ph.D., Qiang Luo, Ph.D., Daniil Sarkysian, Ph.D., Tobias Banaschewski, M.D., Ph.D., Gareth J. Barker, Ph.D., Arun L.W. Bokde, Ph.D., Uli Bromberg, Ph.D., Christian Büchel, M.D., Erin Burke Quinlan, Ph.D., Sylvane Desrivieres, Ph.D., Herta Flor, Ph.D., Vincent Frouin, Ph.D., Hugh Garavan, Ph.D., Penny Gowland, Ph.D., Andreas Heinz, M.D., Ph.D., Bernd Ittermann, Ph.D., Jean-Luc Martinot, M.D., Ph.D., Eric Artiges, M.D., Ph.D., Frauke Nees, Ph.D., Dimitri Papadopoulos Orfanos, Ph.D., Tomáš Paus, M.D., Ph.D., Luise Poustka, M.D., Sarah Hohmann, M.D., Juliane H. Fröhner, M.Sc., Michael N. Smolka, M.D., Henrik Walter, M.D., Ph.D., Robert Whelan, Ph.D., Helge Frieling, M.D., Ph.D., Stefan Bleich, M.D., Ph.D., Edward D. Barker, Ph.D., Ann-Christine Syvänen, Ph.D., Joëlle Rüegg, Ph.D., Tomas J. Ekström, Ph.D., Georgy Bakalkin, Ph.D., Gunter Schumann, M.D., and the IMAGEN Consortium

**Objetivo:** El estrés psicosocial es un factor de riesgo clave para el abuso de sustancias en los adolescentes. Recientemente, los procesos epigenéticos como la metilación de ADN han surgido como potenciales mecanismos que podrían mediar esta relación. Los autores realizaron un análisis de metilación del genoma completo para investigar si las regiones metiladas diferencialmente están asociadas al estrés psicosocial en la población adolescente.

**Método:** Se utilizó un análisis del metiloma completo de las regiones metiladas diferencialmente para examinar una muestra de 1.287 adolescentes de 14 años (50,7% de ellos, mujeres) del estudio europeo IMAGEN. Se utilizó el ensayo *Illumina 450k* para evaluar la metilación de ADN; la pirosecuenciación, para la réplica técnica; y análisis de regresión lineal para identificar asociaciones con el estrés psicosocial y el consumo de sustancias (alcohol y tabaco). Los hallazgos se replicaron a través de la pirosecuenciación de una muestra de prueba de 413 participantes del estudio IMAGEN.

**Resultados:** La hipermetilación en el sitio (locus) del gen del dominio con motivo alfa estéril que contiene el factor de transcripción ETS (SPDEF) estuvo asociada a un mayor número de eventos vitales estresantes de una manera dependiente de los alelos. En los individuos con el alelo menos común G, la metilación de SPDEF moderó la asociación entre el estrés psicosocial y el abuso de sustancias. La metilación de SPDEF interactuó con el estrés a lo largo de la vida en el volumen de sustancia gris en el cíneo derecho, que a su vez estuvo asociado a la frecuencia del consumo de alcohol y tabaco. El SPDEF estuvo implicado en la regulación de trans-genes ligados al consumo de sustancias.

**Conclusiones:** En conjunto, los hallazgos del estudio describen un mecanismo epigenético nuevo que ayuda a explicar cómo la exposición al estrés psicosocial influye en el abuso de sustancias en los adolescentes.

(*Am J Psychiatry* 2019; 176:146–155)



## Predicción de la abstinencia de cocaína basada en el conectoma

Sarah W. Yip, Ph.D., M.Sc., Dustin Scheinost, Ph.D., Marc N. Potenza, M.D., Ph.D., Kathleen M. Carroll, Ph.D.

**Objetivo:** Los autores se propusieron identificar un predictor basado en el cerebro de la abstinencia de la cocaína utilizando modelación predictiva basada en el conectoma (CPM, *connectome-based predictive modeling*), un enfoque de aprendizaje automático desarrollado recientemente. La CPM es una herramienta predictiva y un método para identificar redes que subyacen a comportamientos específicos ("huellas neurales").

**Método:** Cincuenta y tres individuos participaron en protocolos de neuroimágenes al inicio del tratamiento para el trastorno por consumo de cocaína, y nuevamente al final de 12 semanas de tratamiento. Se realizó la CPM con validación cruzada dejando uno fuera para identificar las redes de pre-tratamiento que predecían la abstinencia (porcentaje de muestras negativas de orina con cocaína durante el tratamiento). Las redes se aplicaron a los datos de IRM funcional del post-tratamiento para evaluar los cambios en el tiempo y la capacidad de predecir la abstinencia durante el seguimiento. A continuación, la capacidad predictiva de las redes identificadas fue evaluada en una muestra heterogénea diferente de individuos a quienes se escaneó antes del tratamiento para evaluar el trastorno por consumo de cocaína (N=45).

**Resultados:** La CPM predijo la abstinencia durante el tratamiento, tal como indicó una correspondencia significativa entre los valores de abstinencia anticipada y real ( $r=0,42$ ;  $df=52$ ). Las redes que se identificaron incluyeron conexiones dentro de y entre las redes canónicas implicadas en el control cognitivo/ejecutivo (fronto-parietal, media frontal) y en la capacidad de respuesta a las recompensas (subcortical, de saliencia, sensorial/motora). La potencia de la conectividad no varió con el tratamiento, y la potencia en la evaluación durante el post-tratamiento también predijo la abstinencia de forma significativa durante el seguimiento ( $r=0,34$ ;  $df=39$ ). La potencia de las redes en la muestra independiente predijo la respuesta al tratamiento con una precisión del 64% por sí misma y del 71% cuando se utilizó combinada con el consumo de cocaína al inicio del estudio.

**Conclusiones:** Estos datos demuestran que las diferencias individuales en redes neurales a gran escala contribuyen a la variabilidad en los resultados del tratamiento para el trastorno por consumo de cocaína e identifican redes específicas de abstinencia que pueden ser el objetivo de nuevas intervenciones.

(*Am J Psychiatry* 2019; 176:156–164)
